# Supplementary material for: Investigation of the efficacy of siRNA-mediated KRAS gene silencing in pancreatic cancer therapy
Source: PeerJ. 2024 Nov 12;12:e18214. doi: 10.7717/peerj.18214 (PMC11566511; doi:10.7717/peerj.18214)
Supplement: Supplemental Information 1 — The cell index values for the graphs given for cell proliferation. [file peerj-12-18214-s001.xlsx]

## Sheet: Table 1
Busra KRAS son 04.07.2019 Experiment
Creation Date									07/04/2019 16:15:31														Last Modified Date								12/05/2023 16:16:36
Operator									System Admin														Owner								System Admin
Start Time									07/04/2019 16:21:14														End Time								07/04/2019 17:40:44
Run State									Completed														Software Version								LCS480 1.5.0.39
Macro																							Macro Owner
Macro Status
Templates									Mono Color Hydrolysis Probe - UPL Probe 96-II, 19.11.12 emine ecemis oxa 23														Plate ID								4942804
Test ID																							Lot ID
Color Comp ID
Run Notes
Programs
Program Name									pre-incubation
Cycles									1			Analysis Mode					None
		Target (°C)							Acquisition Mode				Hold (hh:mm:ss)				Ramp Rate (°C/s)							Acquisitions (per °C)						Sec Target (°C)						Step size (°C)					Step Delay (cycles)
		95							None				00:09:59.962000				4.40													0						0					0
Program Name									amplification
Cycles									45			Analysis Mode					Quantification
		Target (°C)							Acquisition Mode				Hold (hh:mm:ss)				Ramp Rate (°C/s)							Acquisitions (per °C)						Sec Target (°C)						Step size (°C)					Step Delay (cycles)
		95							None				00:00:10.022000				4.40													0						0					0
		60							Single				00:00:29.981000				2.20													0						0					0
		72							None				00:00:10.022000				4.40													0						0					0
Program Name									cooling
Cycles									1			Analysis Mode					None
		Target (°C)							Acquisition Mode				Hold (hh:mm:ss)				Ramp Rate (°C/s)							Acquisitions (per °C)						Sec Target (°C)						Step size (°C)					Step Delay (cycles)
		40							None				00:00:29.981000				2.20													0						0					0
Samples
Sample Count									96
Subset									All Samples
		Pos			Name															ID								Repl. Of					Sample Notes
		A1			Control1
Sample Count									96
Subset									All Samples
		Pos			Name															ID								Repl. Of					Sample Notes
		A2			Control 2
		A3			Control 3
		A4			Control 4
		A5			2X siRNA1
		A6			2X siRNA2
		A7			4X siRNA 1
		A8			4X siRNA 2
		A9			8X siRNA 1
		A10			8X siRNA 2
		A11			siRNA 1
		A12			siRNA 2
		B1			NK
		B2			Sample 14
		B3			Sample 15
		B4			Sample 16
		B5			Sample 17
		B6			Sample 18
		B7			Sample 19
		B8			Sample 20
		B9			Sample 21
		B10			Sample 22
		B11			Sample 23
		B12			Sample 24
		C1			Control1
		C2			Control 2
		C3			Control 3
		C4			Control 4
		C5			2X siRNA1
		C6			2X siRNA2
		C7			4X siRNA 1
		C8			4X siRNA 2
		C9			8X siRNA 1
		C10			8X siRNA 2
		C11			siRNA 1
		C12			siRNA 2
		D1			NK
		D2			Sample 38
		D3			Sample 39
		D4			Sample 40
Sample Count									96
Subset									All Samples
		Pos			Name															ID								Repl. Of					Sample Notes
		D5			Sample 41
		D6			Sample 42
		D7			Sample 43
		D8			Sample 44
		D9			Sample 45
		D10			Sample 46
		D11			Sample 47
		D12			Sample 48
		E1			Sample 49
		E2			Sample 50
		E3			Sample 51
		E4			Sample 52
		E5			Sample 53
		E6			Sample 54
		E7			Sample 55
		E8			Sample 56
		E9			Sample 57
		E10			Sample 58
		E11			Sample 59
		E12			Sample 60
		F1			Sample 61
		F2			Sample 62
		F3			Sample 63
		F4			Sample 64
		F5			Sample 65
		F6			Sample 66
		F7			Sample 67
		F8			Sample 68
		F9			Sample 69
		F10			Sample 70
		F11			Sample 71
		F12			Sample 72
		G1			Sample 73
		G2			Sample 74
		G3			Sample 75
		G4			Sample 76
		G5			Sample 77
		G6			Sample 78
		G7			Sample 79
Sample Count									96
Subset									All Samples
		Pos			Name															ID								Repl. Of					Sample Notes
		G8			Sample 80
		G9			Sample 81
		G10			Sample 82
		G11			Sample 83
		G12			Sample 84
		H1			Sample 85
		H2			Sample 86
		H3			Sample 87
		H4			Sample 88
		H5			Sample 89
		H6			Sample 90
		H7			Sample 91
		H8			Sample 92
		H9			Sample 93
		H10			Sample 94
		H11			Sample 95
		H12			Sample 96
Instrument
Name					LC480														Serial Number							26872
Revision History
		Revision					Date									User							Reason
Abs Quant/2nd Derivative Max for Busra KRAS (Abs Quant/2nd Derivative Max) Settings
Channel											465-510
Color Compensation											Off
Program											amplification																											Units
Mode											High Confidence
Subset Name									Busra KRAS
Results
Inc			Pos		Name																	Type								CP				Concentration				Standard					Status
			A1		Control1																	Unknown								29.93
			A2		Control 2																	Unknown								28.88
			A3		Control 3																	Unknown								31.13
Results
Inc			Pos			Name																Type								CP				Concentration					Standard				Status
			A4			Control 4																Unknown								28.00
			A5			2X siRNA1																Unknown								35.98
			A6			2X siRNA2																Unknown								34.14
			A7			4X siRNA 1																Unknown								35.06
			A8			4X siRNA 2																Unknown								35.11
			A9			8X siRNA 1																Unknown								34.84
			A10			8X siRNA 2																Unknown								33.58
			A11			siRNA 1																Unknown								33.04
			A12			siRNA 2																Unknown								33.54
			B1			NK																Negative Control
			C1			Control1																Unknown
			C2			Control 2																Unknown
			C3			Control 3																Unknown
			C4			Control 4																Unknown
			C5			2X siRNA1																Unknown
			C6			2X siRNA2																Unknown
			C7			4X siRNA 1																Unknown
			C8			4X siRNA 2																Unknown
			C9			8X siRNA 1																Unknown
			C10			8X siRNA 2																Unknown
			C11			siRNA 1																Unknown
			C12			siRNA 2																Unknown
			D1			NK																Negative Control
Analysis Notes
Advanced Relative Quantification for Busra KRAS (Relative Quantification)
Settings
Program Name												amplification
Subset												Busra KRAS
AbsQuant Type												Abs Quant/2nd Derivative Max
Subordinate Analysis Setting												Analyze by Target Name														Mean/Median							Mean
Reference Experiment												In-run
Target Names
Target ID												Filter Combination						Standards/Efficiency																	Efficiency Value
ACTB												465-510						Efficiency																	2.00
kRAS												465-510						Efficiency																	2.00
Pairings
Name:				C1/A1															Pairing Setting:								AllToMean
	Position					Sample Name								Sample Type								Target Name									Target Type								Channel
	A1					Control1								Unknown								ACTB									Reference								465-510
	C1					Control1								Unknown								kRAS									Target								465-510
Name:				C2/A2															Pairing Setting:								AllToMean
	Position					Sample Name								Sample Type								Target Name									Target Type								Channel
	A2					Control 2								Unknown								ACTB									Reference								465-510
	C2					Control 2								Unknown								kRAS									Target								465-510
Name:				C3/A3															Pairing Setting:								AllToMean
	Position					Sample Name								Sample Type								Target Name									Target Type								Channel
	A3					Control 3								Unknown								ACTB									Reference								465-510
	C3					Control 3								Unknown								kRAS									Target								465-510
Name:				C4/A4															Pairing Setting:								AllToMean
	Position					Sample Name								Sample Type								Target Name									Target Type								Channel
	A4					Control 4								Unknown								ACTB									Reference								465-510
	C4					Control 4								Unknown								kRAS									Target								465-510
Name:				C5/A5															Pairing Setting:								AllToMean
	Position					Sample Name								Sample Type								Target Name									Target Type								Channel
	A5					2X siRNA1								Unknown								ACTB									Reference								465-510
	C5					2X siRNA1								Unknown								kRAS									Target								465-510
Name:				C6/A6															Pairing Setting:								AllToMean
	Position					Sample Name								Sample Type								Target Name									Target Type								Channel
	A6					2X siRNA2								Unknown								ACTB									Reference								465-510
	C6					2X siRNA2								Unknown								kRAS									Target								465-510
Pairings
		Name:				C7/A7															Pairing Setting:								AllToMean
			Position						Sample Name						Sample Type									Target Name								Target Type									Channel
			A7						4X siRNA 1						Unknown									ACTB								Reference									465-510
			C7						4X siRNA 1						Unknown									kRAS								Target									465-510
		Name:				C8/A8															Pairing Setting:								AllToMean
			Position						Sample Name						Sample Type									Target Name								Target Type									Channel
			A8						4X siRNA 2						Unknown									ACTB								Reference									465-510
			C8						4X siRNA 2						Unknown									kRAS								Target									465-510
		Name:				C9/A9															Pairing Setting:								AllToMean
			Position						Sample Name						Sample Type									Target Name								Target Type									Channel
			A9						8X siRNA 1						Unknown									ACTB								Reference									465-510
			C9						8X siRNA 1						Unknown									kRAS								Target									465-510
		Name:				C10/A10															Pairing Setting:								AllToMean
			Position						Sample Name						Sample Type									Target Name								Target Type									Channel
			A10						8X siRNA 2						Unknown									ACTB								Reference									465-510
			C10						8X siRNA 2						Unknown									kRAS								Target									465-510
		Name:				C11/A11															Pairing Setting:								AllToMean
			Position						Sample Name						Sample Type									Target Name								Target Type									Channel
			A11						siRNA 1						Unknown									ACTB								Reference									465-510
			C11						siRNA 1						Unknown									kRAS								Target									465-510
		Name:				C12/A12															Pairing Setting:								AllToMean
			Position						Sample Name						Sample Type									Target Name								Target Type									Channel
			A12						siRNA 2						Unknown									ACTB								Reference									465-510
			C12						siRNA 2						Unknown									kRAS								Target									465-510
Results
Bar Chart			Pairing					Sample Name					Target Name												Tgt Cp					Ref. Cp			Ratios							Corr/Multi Factor				Status
													Targets					References							Mean					Mean			Tgt/Ref.				Norm
			C1/A1					Control1					kRAS					ACTB												29.93			0							1/1
			C2/A2					Control 2					kRAS					ACTB												28.88			0							1/1
			C3/A3					Control 3					kRAS					ACTB												31.13			0							1/1
			C4/A4					Control 4					kRAS					ACTB												28.00			0							1/1
			C5/A5					2X siRNA1					kRAS					ACTB												35.98			0							1/1
			C6/A6					2X siRNA2					kRAS					ACTB												34.14			0							1/1
			C7/A7					4X siRNA 1					kRAS					ACTB												35.06			0							1/1
			C8/A8					4X siRNA 2					kRAS					ACTB												35.11			0							1/1
			C9/A9					8X siRNA 1					kRAS					ACTB												34.84			0							1/1
			C10/A10					8X siRNA 2					kRAS					ACTB												33.58			0							1/1
			C11/A11					siRNA 1					kRAS					ACTB												33.04			0							1/1
			C12/A12					siRNA 2					kRAS					ACTB												33.54			0							1/1
Analysis Notes
Subordinate for ACTB\465-510\Busra KRAS (Abs Quant/2nd Derivative Max) Settings
Channel											465-510
Color Compensation											Off
Program											amplification																											Units
Mode											High Confidence
Subset Name									ACTB\465-510\Busra KRAS
Results
Inc			Pos			Name																Type								CP				Concentration				Standard					Status
			A1			Control1																Unknown								29.93
			A2			Control 2																Unknown								28.88
			A3			Control 3																Unknown								31.13
			A4			Control 4																Unknown								28.00
			A5			2X siRNA1																Unknown								35.98
			A6			2X siRNA2																Unknown								34.14
			A7			4X siRNA 1																Unknown								35.06
			A8			4X siRNA 2																Unknown								35.11
			A9			8X siRNA 1																Unknown								34.84
			A10			8X siRNA 2																Unknown								33.58
			A11			siRNA 1																Unknown								33.04
			A12			siRNA 2																Unknown								33.54
			B1			NK																Negative Control
Subordinate for kRAS\465-510\Busra KRAS (Abs Quant/2nd Derivative Max)
Settings
Channel											465-510
Color Compensation											Off
Program											amplification																											Units
Mode											High Confidence
Subset Name									kRAS\465-510\Busra KRAS
Results
Inc			Pos			Name																Type								CP				Concentration				Standard					Status
			C1			Control1																Unknown
			C2			Control 2																Unknown
			C3			Control 3																Unknown
			C4			Control 4																Unknown
			C5			2X siRNA1																Unknown
			C6			2X siRNA2																Unknown
			C7			4X siRNA 1																Unknown
			C8			4X siRNA 2																Unknown
			C9			8X siRNA 1																Unknown
			C10			8X siRNA 2																Unknown
			C11			siRNA 1																Unknown
			C12			siRNA 2																Unknown
			D1			NK																Negative Control
Advanced Relative Quantification for Busra KRAS (1) (Relative Quantification)
Settings
Program Name												amplification
Subset												Busra KRAS
AbsQuant Type												Abs Quant/2nd Derivative Max
Subordinate Analysis Setting												Analyze by Target Name														Mean/Median							Mean
Reference Experiment												In-run
Target Names
Target ID												Filter Combination						Standards/Efficiency																	Efficiency Value
ACTB												465-510						Efficiency																	2.00
kRAS												465-510						Efficiency																	2.00
Pairings
Name:				C1/A1															Pairing Setting:								AllToMean
	Position					Sample Name								Sample Type								Target Name									Target Type								Channel
	A1					Control1								Unknown								ACTB									Reference								465-510
	C1					Control1								Unknown								kRAS									Target								465-510
Name:				C2/A2															Pairing Setting:								AllToMean
	Position					Sample Name								Sample Type								Target Name									Target Type								Channel
	A2					Control 2								Unknown								ACTB									Reference								465-510
	C2					Control 2								Unknown								kRAS									Target								465-510
Name:				C3/A3															Pairing Setting:								AllToMean
	Position					Sample Name								Sample Type								Target Name									Target Type								Channel
	A3					Control 3								Unknown								ACTB									Reference								465-510
	C3					Control 3								Unknown								kRAS									Target								465-510
Name:				C4/A4															Pairing Setting:								AllToMean
	Position					Sample Name								Sample Type								Target Name									Target Type								Channel
	A4					Control 4								Unknown								ACTB									Reference								465-510
	C4					Control 4								Unknown								kRAS									Target								465-510
Name:				C5/A5															Pairing Setting:								AllToMean
	Position					Sample Name								Sample Type								Target Name									Target Type								Channel
	A5					2X siRNA1								Unknown								ACTB									Reference								465-510
	C5					2X siRNA1								Unknown								kRAS									Target								465-510
Name:				C6/A6															Pairing Setting:								AllToMean
	Position					Sample Name								Sample Type								Target Name									Target Type								Channel
	A6					2X siRNA2								Unknown								ACTB									Reference								465-510
	C6					2X siRNA2								Unknown								kRAS									Target								465-510
Pairings
		Name:				C7/A7															Pairing Setting:								AllToMean
			Position						Sample Name						Sample Type									Target Name								Target Type									Channel
			A7						4X siRNA 1						Unknown									ACTB								Reference									465-510
			C7						4X siRNA 1						Unknown									kRAS								Target									465-510
		Name:				C8/A8															Pairing Setting:								AllToMean
			Position						Sample Name						Sample Type									Target Name								Target Type									Channel
			A8						4X siRNA 2						Unknown									ACTB								Reference									465-510
			C8						4X siRNA 2						Unknown									kRAS								Target									465-510
		Name:				C9/A9															Pairing Setting:								AllToMean
			Position						Sample Name						Sample Type									Target Name								Target Type									Channel
			A9						8X siRNA 1						Unknown									ACTB								Reference									465-510
			C9						8X siRNA 1						Unknown									kRAS								Target									465-510
		Name:				C10/A10															Pairing Setting:								AllToMean
			Position						Sample Name						Sample Type									Target Name								Target Type									Channel
			A10						8X siRNA 2						Unknown									ACTB								Reference									465-510
			C10						8X siRNA 2						Unknown									kRAS								Target									465-510
		Name:				C11/A11															Pairing Setting:								AllToMean
			Position						Sample Name						Sample Type									Target Name								Target Type									Channel
			A11						siRNA 1						Unknown									ACTB								Reference									465-510
			C11						siRNA 1						Unknown									kRAS								Target									465-510
		Name:				C12/A12															Pairing Setting:								AllToMean
			Position						Sample Name						Sample Type									Target Name								Target Type									Channel
			A12						siRNA 2						Unknown									ACTB								Reference									465-510
			C12						siRNA 2						Unknown									kRAS								Target									465-510
Results
Bar Chart			Pairing					Sample Name					Target Name												Tgt Cp					Ref. Cp			Ratios							Corr/Multi Factor				Status
													Targets					References							Mean					Mean			Tgt/Ref.				Norm
			C1/A1					Control1					kRAS					ACTB												29.93			0							1/1
			C2/A2					Control 2					kRAS					ACTB												28.88			0							1/1
			C3/A3					Control 3					kRAS					ACTB												31.13			0							1/1
			C4/A4					Control 4					kRAS					ACTB												28.00			0							1/1
			C5/A5					2X siRNA1					kRAS					ACTB												35.98			0							1/1
			C6/A6					2X siRNA2					kRAS					ACTB												34.14			0							1/1
			C7/A7					4X siRNA 1					kRAS					ACTB												35.06			0							1/1
			C8/A8					4X siRNA 2					kRAS					ACTB												35.11			0							1/1
			C9/A9					8X siRNA 1					kRAS					ACTB												34.84			0							1/1
			C10/A10					8X siRNA 2					kRAS					ACTB												33.58			0							1/1
			C11/A11					siRNA 1					kRAS					ACTB												33.04			0							1/1
			C12/A12					siRNA 2					kRAS					ACTB												33.54			0							1/1
Analysis Notes
Subordinate for ACTB\465-510\Busra KRAS (Abs Quant/2nd Derivative Max) Settings
Channel											465-510
Color Compensation											Off
Program											amplification																											Units
Mode											High Confidence
Subset Name									ACTB\465-510\Busra KRAS
Subordinate for kRAS\465-510\Busra KRAS (Abs Quant/2nd Derivative Max) Settings
Channel											465-510
Color Compensation											Off
Program											amplification																											Units
Mode											High Confidence
Subset Name									kRAS\465-510\Busra KRAS
