# Supplementary material for: Investigation of the efficacy of siRNA-mediated KRAS gene silencing in pancreatic cancer therapy
Source: PeerJ. 2024 Nov 12;12:e18214. doi: 10.7717/peerj.18214 (PMC11566511; doi:10.7717/peerj.18214)
Supplement: Supplemental Information 2 — The data showing the Cp values and amplification obtained on the LightCycler 480 device. [file peerj-12-18214-s002.xlsx]

## Sheet: Absorbance 1_01
Measurement results
capan 1. 18.04.19
18.04.2019 14:57:12
Absorbance 1
Wavelength: 438 nm
Plate 1
Abs	1	2	3	4	5	6	7	8	9	10	11	12
A	0.264	0.334	0.905	1.157	1.092	1.039	1.255	1.088
B	0.233	0.586	1.084	1.064	1.242	1.226	1.293	0.812
C	0.232	0.81	1.06	1.119	1.097	0.978	1.056	1.034
D	0.256	0.244	1.834	1.021	0.979	0.95	0.915	0.932
E	0.232	0.244	0.254	0.76	0.906	0.861	0.718	0.735
F	1.035	0.912	1.007	0.856	0.981	0.835	0.753	0.796
G
H
Sample	1	2	3	4	5	6	7	8	9	10	11	12
A	Un0001	Un0002	Un0003	Un0004	Un0005	Un0006	Un0007	Un0008
B	Un0009	Un0010	Un0011	Un0012	Un0013	Un0014	Un0015	Un0016
C	Un0017	Un0018	Un0019	Un0020	Un0021	Un0022	Un0023	Un0024
D	Un0025	Un0026	Un0027	Un0028	Un0029	Un0030	Un0031	Un0032
E	Un0033	Un0034	Un0035	Un0036	Un0037	Un0038	Un0039	Un0040
F	Un0041	Un0042	Un0043	Un0044	Un0045	Un0046	Un0047	Un0048
G
H

## Sheet: Sayfa1
Abs	A	B	C	D	E	F	Control	0.264	1	Control
1		0.233	0.232	0.256			Control	0.334	1	Control
2		0.586	0.81	0.244			Control	0.905	1	Control
3		1.084	1.06	1.834			SiRNA	0.232	2	SiRNA	2.15948	46.3074	48.5695	SiRNA	48.5695
4				1.021			SiRNA	0.244	2	SiRNA	2.05328	48.7026
5				0.979			SiRNA	0.254	2	SiRNA	1.97244	50.6986
6				0.95			NP1	1.157	3	NP1	0.433016	230.938	218.762	NP1	218.762
7	1.255	1.293	1.056	0.915	0.718	0.753	NP1	1.092	3	NP1	0.458791	217.964
8	1.088	0.812	1.034	0.932	0.735	0.796	NP1	1.039	3	NP2	0.482194	207.385
							NP2	1.064	4	NP2	0.470865	212.375	234.997	NP2	234.997
							NP2	1.242	4	NP2	0.403382	247.904
							NP2	1.226	4	NP2	0.408646	244.711
							NP3	1.119	5	NP3	0.447721	223.353	212.508	NP3	212.508
					Kontrol Ort	0.501	NP3	1.097	5	NP3	0.4567	218.962
							NP3	0.978	5	NP3	0.51227	195.21
							SiRNA+NP1	1.035	6	SiRNA+NP1	0.484058	206.587	196.54	SiRNA+NP1	196.54
							SiRNA+NP1	0.912	6	SiRNA+NP1	0.549342	182.036
							SiRNA+NP1	1.007	6	SiRNA+NP1	0.497517	200.998
							SiRNA+NP2	0.76	7	SiRNA+NP2	0.659211	151.697	168.13	SiRNA+NP2	168.13
							SiRNA+NP2	0.906	7	SiRNA+NP2	0.55298	180.838
							SiRNA+NP2	0.861	7	SiRNA+NP2	0.581882	171.856
							SiRNA+NP3	0.856	8	SiRNA+NP3	0.58528	170.858	177.778	SiRNA+NP3	177.778
							SiRNA+NP3	0.981	8	SiRNA+NP3	0.510703	195.808
							SiRNA+NP3	0.835	8	SiRNA+NP3	0.6	166.667

## Sheet: Sayfa2
0.264	1	Control	52.6946			0.501
0.334	1	Control	66.6667
0.905	1	Control	180.639
0.232	2	SiRNA	46.3074
0.244	2	SiRNA	48.7026
0.254	2	SiRNA	50.6986
1.157	3	NP1	230.938
1.092	3	NP1	217.964
1.039	3	NP1	207.385
1.064	4	NP2	212.375
1.242	4	NP2	247.904
1.226	4	NP2	244.711
1.119	5	NP3	223.353
1.097	5	NP3	218.962
0.978	5	NP3	195.21
1.035	6	SiRNA+NP1	206.587
0.912	6	SiRNA+NP1	182.036
1.007	6	SiRNA+NP1	200.998
0.76	7	SiRNA+NP2	151.697
0.906	7	SiRNA+NP2	180.838
0.861	7	SiRNA+NP2	171.856
0.856	8	SiRNA+NP3	170.858
0.981	8	SiRNA+NP3	195.808
0.835	8	SiRNA+NP3	166.667

## Sheet: Sayfa3
siRNA	2.15948	2
siRNA	2.05328	2
siRNA	1.97244	2
0,5 mg/ml bPEI/AuNP	0.433016	3
0,5 mg/ml bPEI/AuNP	0.458791	3
0,5 mg/ml PEI/AuNP	0.482194	3
0,25 mg/ml bPEI/AuNP	0.470865	4
0,25 mg/ml PEI/AuNP	0.403382	4
0,25 mg/ml PEI/AuNP	0.408646	4
0,125 mg/ml PEI/AuNP	0.447721	5
0,125 mg/ml PEI/AuNP	0.4567	5
0,125 mg/ml PEI/AuNP	0.51227	5
siRNA+0,5 mg/ml bPEI/AuNP	0.484058	6
siRNA+0,5 mg/ml bPEI/AuNP	0.549342	6
siRNA+0,5 mg/ml bPEI/AuNP	0.497517	6
siRNA+0,25 mg/ml bPEI/AuNP	0.659211	7
siRNA+0,25 mg/ml bPEI/AuNP	0.55298	7
siRNA+0,25 mg/ml bPEI/AuNP	0.581882	7
siRNA+0,125 mg/ml bPEI/AuNP	0.58528	8
siRNA+0,125 mg/ml bPEI/AuNP	0.510703	8
siRNA+0,125 mg/ml bPEI/AuNP	0.6	8

## Sheet: Sayfa3 (2)
			"-np"	"-sirna"
SiRNA	0.232	0.463074			0.501
SiRNA	0.244	0.487026
SiRNA	0.254	0.506986
NP1	1.157	2.30938
NP1	1.092	2.17964
NP1	1.039	2.07385
NP2	1.064	2.12375
NP2	1.242	2.47904
NP2	1.226	2.44711
NP3	1.119	2.23353
NP3	1.097	2.18962
NP3	0.978	1.9521
SiRNA+NP1	1.035	2.06587	0.061	1.58017
SiRNA+NP1	0.912	1.82036	0.184	1.33466
SiRNA+NP1	1.007	2.00998	0.089	1.52428
SiRNA+NP2	0.76	1.51697	0.417333	1.03127
SiRNA+NP2	0.906	1.80838	0.271333	1.32269
SiRNA+NP2	0.861	1.71856	0.316333	1.23287
SiRNA+NP3	0.856	1.70858	0.208667	1.22289
SiRNA+NP3	0.981	1.95808	0.0836667	1.47239
SiRNA+NP3	0.835	1.66667	0.229667	1.18097

## Sheet: Sayfa10
0,232
0,244
0,254
1,157
1,092
1,039
1,064
1,242
1,226
1,119
1,097
0,978
1,035
0,912
1,007
0,76
0,906
0,861
0,856
0,981
0,835

## Sheet: Sayfa3 (3)
			"-np"	"-sirna"
SiRNA	0,232	0,463073852295409			0,501
SiRNA	0,244	0,487025948103792
SiRNA	0,254	0,506986027944112
NP1	1,157	2,30938123752495
NP1	1,092	2,17964071856287
NP1	1,039	2,07385229540918
NP2	1,064	2,12375249500998
NP2	1,242	2,47904191616766
NP2	1,226	2,44710578842315
NP3	1,119	2,23353293413174
NP3	1,097	2,18962075848303
NP3	0,978	1,95209580838323
SiRNA+NP1	1,035	2,06586826347305	0,0610000000000002	1,58017298735862
SiRNA+NP1	0,912	1,82035928143713	0,184	1,33466400532269
SiRNA+NP1	1,007	2,00998003992016	0,0890000000000002	1,52428476380572
SiRNA+NP2	0,76	1,51696606786427	0,417333333333333	1,03127079174983
SiRNA+NP2	0,906	1,80838323353293	0,271333333333333	1,3226879574185
SiRNA+NP2	0,861	1,7185628742515	0,316333333333333	1,23286759813706
SiRNA+NP3	0,856	1,70858283433134	0,208666666666667	1,2228875582169
SiRNA+NP3	0,981	1,95808383233533	0,0836666666666667	1,47238855622089
SiRNA+NP3	0,835	1,66666666666667	0,229666666666667	1,18097139055223

## Sheet: Sayfa9
	SiRNA (adjusted)	SiRNA	Mann-Whitney U						SiRNA	0.232
			Z	p					SiRNA	0.244
Mean	0,21	0,24	-0,832	0,405					SiRNA	0.254
Std Deviation	0,12	0,01							SiRNA_adj	0.061
									SiRNA_adj	0.184
									SiRNA_adj	0.089
									SiRNA_adj	0.417333
									SiRNA_adj	0.271333
									SiRNA_adj	0.316333
									SiRNA_adj	0.208667
									SiRNA_adj	0.0836667
									SiRNA_adj	0.229667
