# Supplementary material for: Investigation of the efficacy of siRNA-mediated KRAS gene silencing in pancreatic cancer therapy
Source: PeerJ. 2024 Nov 12;12:e18214. doi: 10.7717/peerj.18214 (PMC11566511; doi:10.7717/peerj.18214)
Supplement: Supplemental Information 3 [file peerj-12-18214-s003.xlsx]

## Sheet: 20h
		CellIndex					Kruskal-Wallis		Sig.Diff.
		Minimum	Median	Mean	Std.Dev.	Maximum	H(df)	p
a	Control	0.5878	0.7084	0.7	0.1082	0.8038	4.507(7)	0.72	-
b	SiRNA	0.4992	0.6337	0.5983	0.087	0.662			-
c	0.5 mg/ml bPEI/AuNP	0.4854	0.7154	0.6488	0.1423	0.7457			-
d	0.25 mg/ml bPEI/AuNP	0.5782	0.7141	0.7042	0.1214	0.8203			-
e	0.125 mg/ml bPEI/AuNP	0.4889	0.5314	0.5627	0.0935	0.6678			-
f	0.5 mg/ml bPEI/AuNP + SiRNA	0.454	0.6087	0.5834	0.1188	0.6875			-
g	0.25 mg/ml bPEI/AuNP + SiRNA	0.558	0.5985	0.6318	0.0949	0.7389			-
h	0.125 mg/ml bPEI/AuNP + SiRNA	0.5334	0.5846	0.6142	0.0989	0.7245			-

## Sheet: 48h
		CellIndex					Kruskal-Wallis		Sig.Diff.					Pairwise Comparisons of group
		Minimum	Median	Mean	Std.Dev.	Maximum	H(df)	p						Sample 1-Sample 2	Test Statistic	Std. Error	Std. Test Statistic	Sig.
a	Control	1.0915	1.6081	1.4579	0.3191	1.6742	17.813(7)	0.013	d,e,g					0.25 mg NP-Control	16	5.774	2.771	0.006
b	SiRNA	1.1735	1.5485	1.5729	0.4121	1.9967			d,e,g,f					0.125 mg NP-Control	16	5.774	2.771	0.006
c	0.5 mg/ml bPEI/AuNP	0.2026	0.2089	0.2118	0.011	0.224			-					0.25 mg NP-SiRNA	16.333	5.774	2.829	0.005
d	0.25 mg/ml bPEI/AuNP	0.0714	0.0758	0.0828	0.0161	0.1013			b					0.125 mg NP-SiRNA	16.333	5.774	2.829	0.005
e	0.125 mg/ml bPEI/AuNP	-0.0441	0.0554	0.0513	0.0935	0.1427			a, b					0.25 mg NP-0.5 mg NP	10.667	5.774	1.848	0.065
f	0.5 mg/ml bPEI/AuNP + SiRNA	0.1207	0.1314	0.1281	0.0065	0.1323			b					0.125 mg NP-0.5 mg NP	10.667	5.774	1.848	0.065
g	0.25 mg/ml bPEI/AuNP + SiRNA	0.0865	0.1103	0.1152	0.0315	0.1489			a,b,c					0.25 mg NP-0.125 mg NP	0	5.774	0	1
h	0.125 mg/ml bPEI/AuNP + SiRNA	0.0394	0.1865	0.1959	0.1614	0.3617								0.25 mg NP-0.25 mg NP + SiRNA	-3.667	5.774	-0.635	0.525
														0.25 mg NP-0.5 mg NP + SiRNA	-4.667	5.774	-0.808	0.419
														0.25 mg NP-0.125 mg NP + SiRNA	-6	5.774	-1.039	0.299
														0.125 mg NP-0.25 mg NP + SiRNA	-3.667	5.774	-0.635	0.525
														0.125 mg NP-0.5 mg NP + SiRNA	-4.667	5.774	-0.808	0.419
														0.125 mg NP-0.125 mg NP + SiRNA	-6	5.774	-1.039	0.299
														0.25 mg NP + SiRNA-0.5 mg NP + SiRNA	1	5.774	0.173	0.862
														0.25 mg NP + SiRNA-0.125 mg NP + SiRNA	-2.333	5.774	-0.404	0.686
														0.25 mg NP + SiRNA-0.5 mg NP	7	5.774	1.212	0.225
														0.25 mg NP + SiRNA-Control	12.333	5.774	2.136	0.033
														0.25 mg NP + SiRNA-SiRNA	12.667	5.774	2.194	0.028
														0.5 mg NP + SiRNA-0.125 mg NP + SiRNA	-1.333	5.774	-0.231	0.817
														0.5 mg NP + SiRNA-0.5 mg NP	6	5.774	1.039	0.299
														0.5 mg NP + SiRNA-Control	11.333	5.774	1.963	0.05
														0.5 mg NP + SiRNA-SiRNA	11.667	5.774	2.021	0.043
														0.125 mg NP + SiRNA-0.5 mg NP	4.667	5.774	0.808	0.419
														0.125 mg NP + SiRNA-Control	10	5.774	1.732	0.083
														0.125 mg NP + SiRNA-SiRNA	10.333	5.774	1.79	0.073
														0.5 mg NP-Control	5.333	5.774	0.924	0.356
														0.5 mg NP-SiRNA	5.667	5.774	0.981	0.326
														Control-SiRNA	-0.333	5.774	-0.058	0.954
														Each row tests the null hypothesis that the Sample 1 and Sample 2 distributions are the same.
														Asymptotic significances (2-sided tests) are displayed. The significance level is 0.05.
														a Significance values have been adjusted by the Bonferroni correction for multiple tests.

## Sheet: 50h
		CellIndex					Kruskal-Wallis		Sig.Diff.			Pairwise Comparisons of group
		Minimum	Median	Mean	Std.Dev.	Maximum	H(df)	p				Sample 1-Sample 2	Test Statistic	Std. Error	Std. Test Statistic	Sig.
a	Control	1.2364	1.4392	1.3984	0.1459	1.5196	19.467(7)	0.007	d,e,g			0.25 mg NP-0.125 mg NP	-0.667	5.774	-0.115	0.908
b	SiRNA	1.1732	1.7758	1.6353	0.4103	1.9568			d,e,g			0.25 mg NP-0.25 mg NP + SiRNA	-5.333	5.774	-0.924	0.356
c	0.5 mg/ml bPEI/AuNP	0.1914	0.2365	0.2233	0.0277	0.2419			d,e			0.25 mg NP-0.125 mg NP + SiRNA	-6.667	5.774	-1.155	0.248
d	0.25 mg/ml bPEI/AuNP	-0.0067	0.044	0.0431	0.0494	0.092			a,b,c			0.25 mg NP-0.5 mg NP + SiRNA	-8	5.774	-1.386	0.166
e	0.125 mg/ml bPEI/AuNP	0.0066	0.0777	0.0566	0.0435	0.0855			a,b,c			0.25 mg NP-0.5 mg NP	12.333	5.774	2.136	0.033
f	0.5 mg/ml bPEI/AuNP + SiRNA	0.1264	0.1388	0.1414	0.0165	0.1591			-			0.25 mg NP-Control	17	5.774	2.944	0.003
g	0.25 mg/ml bPEI/AuNP + SiRNA	0.0803	0.1167	0.1123	0.03	0.1398			a,b			0.25 mg NP-SiRNA	18	5.774	3.118	0.002
h	0.125 mg/ml bPEI/AuNP + SiRNA	0.0556	0.1378	0.1442	0.0919	0.2391			-			0.125 mg NP-0.25 mg NP + SiRNA	-4.667	5.774	-0.808	0.419
												0.125 mg NP-0.125 mg NP + SiRNA	-6	5.774	-1.039	0.299
												0.125 mg NP-0.5 mg NP + SiRNA	-7.333	5.774	-1.27	0.204
												0.125 mg NP-0.5 mg NP	11.667	5.774	2.021	0.043
												0.125 mg NP-Control	16.333	5.774	2.829	0.005
												0.125 mg NP-SiRNA	17.333	5.774	3.002	0.003
												0.25 mg NP + SiRNA-0.125 mg NP + SiRNA	-1.333	5.774	-0.231	0.817
												0.25 mg NP + SiRNA-0.5 mg NP + SiRNA	2.667	5.774	0.462	0.644
												0.25 mg NP + SiRNA-0.5 mg NP	7	5.774	1.212	0.225
												0.25 mg NP + SiRNA-Control	11.667	5.774	2.021	0.043
												0.25 mg NP + SiRNA-SiRNA	12.667	5.774	2.194	0.028
												0.125 mg NP + SiRNA-0.5 mg NP + SiRNA	1.333	5.774	0.231	0.817
												0.125 mg NP + SiRNA-0.5 mg NP	5.667	5.774	0.981	0.326
												0.125 mg NP + SiRNA-Control	10.333	5.774	1.79	0.073
												0.125 mg NP + SiRNA-SiRNA	11.333	5.774	1.963	0.05
												0.5 mg NP + SiRNA-0.5 mg NP	4.333	5.774	0.751	0.453
												0.5 mg NP + SiRNA-Control	9	5.774	1.559	0.119
												0.5 mg NP + SiRNA-SiRNA	10	5.774	1.732	0.083
												0.5 mg NP-Control	4.667	5.774	0.808	0.419
												0.5 mg NP-SiRNA	5.667	5.774	0.981	0.326
												Control-SiRNA	-1	5.774	-0.173	0.862

## Sheet: 72h
		CellIndex					Kruskal-Wallis		Sig.Diff.			Pairwise Comparisons of group
		Minimum	Median	Mean	Std.Dev.	Maximum	H(df)	p				Sample 1-Sample 2	Test Statistic	Std. Error	Std. Test Statistic	Sig.
a	Control	1.9236	1.9631	2.0078	0.1134	2.1368	15.987(7)	0.025	c,d,f,h			0.25 mg NP + SiRNA-0.5 mg NP + SiRNA	1.333	5.774	0.231	0.817
b	SiRNA	1.7434	2.0755	1.9665	0.1932	2.0806			d,e,f,g,h			0.25 mg NP + SiRNA-0.25 mg NP	1.667	5.774	0.289	0.773
c	0.5 mg/ml bPEI/AuNP	0.1305	0.1641	0.1629	0.0318	0.1941			-			0.25 mg NP + SiRNA-0.125 mg NP	2	5.774	0.346	0.729
d	0.25 mg/ml bPEI/AuNP	0.0895	0.0911	0.095	0.0082	0.1045			a,b			0.25 mg NP + SiRNA-0.125 mg NP + SiRNA	-3	5.774	-0.52	0.603
e	0.125 mg/ml bPEI/AuNP	0.0074	0.0409	0.0803	0.0987	0.1926			a,b			0.25 mg NP + SiRNA-0.5 mg NP	9	5.774	1.559	0.119
f	0.5 mg/ml bPEI/AuNP + SiRNA	-0.0683	0.1007	0.0545	0.1074	0.1311			a,b			0.25 mg NP + SiRNA-SiRNA	14.667	5.774	2.54	0.011
g	0.25 mg/ml bPEI/AuNP + SiRNA	-0.0439	0.0654	0.0466	0.0827	0.1183			a,b			0.25 mg NP + SiRNA-Control	15	5.774	2.598	0.009
h	0.125 mg/ml bPEI/AuNP + SiRNA	-0.055	0.1288	0.069	0.1074	0.1332			a,b			0.5 mg NP + SiRNA-0.25 mg NP	0.333	5.774	0.058	0.954
												0.5 mg NP + SiRNA-0.125 mg NP	0.667	5.774	0.115	0.908
												0.5 mg NP + SiRNA-0.125 mg NP + SiRNA	-1.667	5.774	-0.289	0.773
												0.5 mg NP + SiRNA-0.5 mg NP	7.667	5.774	1.328	0.184
												0.5 mg NP + SiRNA-SiRNA	13.333	5.774	2.309	0.021
												0.5 mg NP + SiRNA-Control	13.667	5.774	2.367	0.018
												0.25 mg NP-0.125 mg NP	-0.333	5.774	-0.058	0.954
												0.25 mg NP-0.125 mg NP + SiRNA	-1.333	5.774	-0.231	0.817
												0.25 mg NP-0.5 mg NP	7.333	5.774	1.27	0.204
												0.25 mg NP-SiRNA	13	5.774	2.252	0.024
												0.25 mg NP-Control	13.333	5.774	2.309	0.021
												0.125 mg NP-0.125 mg NP + SiRNA	-1	5.774	-0.173	0.862
												0.125 mg NP-0.5 mg NP	7	5.774	1.212	0.225
												0.125 mg NP-SiRNA	12.667	5.774	2.194	0.028
												0.125 mg NP-Control	13	5.774	2.252	0.024
												0.125 mg NP + SiRNA-0.5 mg NP	6	5.774	1.039	0.299
												0.125 mg NP + SiRNA-SiRNA	11.667	5.774	2.021	0.043
												0.125 mg NP + SiRNA-Control	12	5.774	2.078	0.038
												0.5 mg NP-SiRNA	5.667	5.774	0.981	0.326
												0.5 mg NP-Control	6	5.774	1.039	0.299
												SiRNA-Control	0.333	5.774	0.058	0.954
												Each row tests the null hypothesis that the Sample 1 and Sample 2 distributions are the same.
												Asymptotic significances (2-sided tests) are displayed. The significance level is 0.05.
												a Significance values have been adjusted by the Bonferroni correction for multiple tests.

## Sheet: 96h
		CellIndex					Kruskal-Wallis		Sig.Diff.				Pairwise Comparisons of group
		Minimum	Median	Mean	Std.Dev.	Maximum	H(df)	p					Sample 1-Sample 2	Test Statistic	Std. Error	Std. Test Statistic	Sig.
a	Control	2.2507	2.254	2.2878	0.0614	2.3587	16.053(7)	0.025	d,e,f,h				0.5 mg NP + SiRNA-0.25 mg NP	4.667	5.774	0.808	0.419
b	SiRNA	1.9693	1.9792	2.049	0.1296	2.1986			f				0.5 mg NP + SiRNA-0.125 mg NP	4.667	5.774	0.808	0.419
c	0.5 mg/ml bPEI/AuNP	0.061	0.1734	0.1735	0.1126	0.2861			-				0.5 mg NP + SiRNA-0.25 mg NP + SiRNA	-4.667	5.774	-0.808	0.419
d	0.25 mg/ml bPEI/AuNP	0.0022	0.081	0.0624	0.0534	0.104			-				0.5 mg NP + SiRNA-0.125 mg NP + SiRNA	-5.333	5.774	-0.924	0.356
e	0.125 mg/ml bPEI/AuNP	-0.059	0.0956	0.0656	0.1126	0.1602			-				0.5 mg NP + SiRNA-0.5 mg NP	9.667	5.774	1.674	0.094
f	0.5 mg/ml bPEI/AuNP + SiRNA	0.0016	0.0109	0.0241	0.0312	0.0597			a,b				0.5 mg NP + SiRNA-SiRNA	15.333	5.774	2.656	0.008
g	0.25 mg/ml bPEI/AuNP + SiRNA	0.0121	0.0772	0.0639	0.0466	0.1023			-				0.5 mg NP + SiRNA-Control	18.333	5.774	3.175	0.001
h	0.125 mg/ml bPEI/AuNP + SiRNA	0.0234	0.0437	0.0969	0.1101	0.2235			a				0.25 mg NP-Control	13.667	5.774	2.367	0.018
													0.125 mg NP-Control	13.667	5.774	2.367	0.018
													0.25 mg NP + SiRNA-Control	13.667	5.774	2.367	0.018
													0.25 mg NP-SiRNA	10.667	5.774	1.848	0.065
													0.125 mg NP-SiRNA	10.667	5.774	1.848	0.065
													0.25 mg NP + SiRNA-SiRNA	10.667	5.774	1.848	0.065
													0.25 mg NP-0.5 mg NP	5	5.774	0.866	0.386
													0.125 mg NP-0.5 mg NP	5	5.774	0.866	0.386
													0.25 mg NP + SiRNA-0.5 mg NP	5	5.774	0.866	0.386
													0.25 mg NP-0.125 mg NP	0	5.774	0	1
													0.25 mg NP-0.25 mg NP + SiRNA	0	5.774	0	1
													0.25 mg NP-0.125 mg NP + SiRNA	-0.667	5.774	-0.115	0.908
													0.125 mg NP-0.25 mg NP + SiRNA	0	5.774	0	1
													0.125 mg NP-0.125 mg NP + SiRNA	-0.667	5.774	-0.115	0.908
													0.25 mg NP + SiRNA-0.125 mg NP + SiRNA	-0.667	5.774	-0.115	0.908
													0.125 mg NP + SiRNA-0.5 mg NP	4.333	5.774	0.751	0.453
													0.125 mg NP + SiRNA-SiRNA	10	5.774	1.732	0.083
													0.125 mg NP + SiRNA-Control	13	5.774	2.252	0.024
													0.5 mg NP-SiRNA	5.667	5.774	0.981	0.326
													0.5 mg NP-Control	8.667	5.774	1.501	0.133
													SiRNA-Control	3	5.774	0.52	0.603
													Each row tests the null hypothesis that the Sample 1 and Sample 2 distributions are the same.
													Asymptotic significances (2-sided tests) are displayed. The significance level is 0.05.
													a Significance values have been adjusted by the Bonferroni correction for multiple tests.
